# Supplementary material for: Differential Effect of Polymorphisms on Body Mass Index Across the Life Course of Japanese: The Japan Multi-Institutional Collaborative Cohort Study
Source: PubMed Central journal article supplement (PMC7878711; doi:10.2188/jea.je20190296), 2021-03-05
Supplement: je-31-172-s001.pdf [file je-31-172-s001.pdf]

Table 1. List of all SNPs examined

| SNP         | Current BMI <sup>a</sup> | BMI at 20 <sup>a</sup> | BMI change <sup>a</sup> | Chr. <sup>a</sup> | Position (bp) <sup>a</sup> | Candidate gene(s) <sup>a</sup> | Current BMI    |                 |                      | BMI at 20      |                 |                      | BMI change     |                 |                      |
|-------------|--------------------------|------------------------|-------------------------|-------------------|----------------------------|--------------------------------|----------------|-----------------|----------------------|----------------|-----------------|----------------------|----------------|-----------------|----------------------|
|             |                          |                        |                         |                   |                            |                                | β <sup>a</sup> | SE <sup>a</sup> | P-value <sup>a</sup> | β <sup>a</sup> | SE <sup>a</sup> | P-value <sup>a</sup> | β <sup>a</sup> | SE <sup>a</sup> | P-value <sup>a</sup> |
|             |                          |                        |                         |                   |                            |                                |                |                 |                      |                |                 |                      |                |                 |                      |
| rs12045597  | +                        | -                      | -                       | 1                 | 1708801                    | NADK                           | 0.015          | 0.041           | 0.718                | -0.005         | 0.031           | 0.863                | 0.000          | 0.001           | 0.849                |
| rs2076463   | +                        | -                      | -                       | 1                 | 27971092                   | FGFR, IFI6                     | 0.032          | 0.045           | 0.477                | -0.008         | 0.034           | 0.808                | 0.001          | 0.001           | 0.566                |
| rs657452    | +                        | -                      | -                       | 1                 | 49598847                   | AGRL4                          | 0.007          | 0.042           | 0.875                | 0.016          | 0.032           | 0.614                | 0.000          | 0.001           | 0.980                |
| rs3110126   | +                        | -                      | -                       | 1                 | 72712055                   | NEGR1, LINC01260               | 0.020          | 0.045           | 0.635                | -0.029         | 0.037           | 0.503                | 0.000          | 0.001           | 0.627                |
| rs12566985  | +                        | +                      | -                       | 1                 | 75002193                   | PGFT-TNNI3K, TNNI3K            | -0.159         | 0.074           | 0.030                | -0.133         | 0.056           | 0.016                | -0.003         | 0.002           | 0.196                |
| rs12041852  | +                        | -                      | -                       | 1                 | 75003500                   | PGFT-TNNI3K, TNNI3K            | -0.159         | 0.074           | 0.030                | -0.133         | 0.056           | 0.016                | -0.003         | 0.002           | 0.196                |
| rs11165643  | +                        | -                      | -                       | 1                 | 96924097                   | LINC01787, PTBP2               | -0.019         | 0.046           | 0.677                | -0.019         | 0.035           | 0.582                | 0.000          | 0.001           | 0.878                |
| rs11185092  | +                        | -                      | -                       | 1                 | 10786278                   | WTFG1                          | 0.059          | 0.055           | 0.282                | 0.048          | 0.041           | 0.245                | 0.001          | 0.002           | 0.737                |
| rs1092374   | +                        | -                      | -                       | 1                 | 11954842                   | LINC05378932, WARS2            | 0.068          | 0.042           | 0.103                | 0.068          | 0.039           | 0.040                | 0.001          | 0.001           | 0.627                |
| rs860295    | +                        | -                      | -                       | 1                 | 15576708                   | GOML                           | 0.080          | 0.047           | 0.089                | 0.009          | 0.036           | 0.811                | 0.002          | 0.001           | 1.02                 |
| rs17490051  | +                        | -                      | -                       | 1                 | 155860091                  | SYT11, RIT1                    | 0.069          | 0.050           | 0.166                | 0.017          | 0.038           | 0.661                | 0.002          | 0.001           | 0.248                |
| rs347313    | +                        | -                      | -                       | 1                 | 162304276                  | NOS1AP                         | -0.080         | 0.051           | 0.117                | -0.070         | 0.039           | 0.070                | 0.000          | 0.002           | 0.874                |
| rs635315    | +                        | -                      | -                       | 1                 | 177825280                  | LINC01741, SEC16B              | 0.064          | 0.049           | 0.190                | 0.087          | 0.037           | 0.019                | 0.000          | 0.001           | 0.768                |
| rs543874    | +                        | -                      | -                       | 1                 | 177920345                  | LINC01741, SEC16B              | 0.058          | 0.049           | 0.240                | 0.081          | 0.037           | 0.029                | 0.000          | 0.001           | 0.842                |
| rs10920678  | +                        | -                      | -                       | 1                 | 190239907                  | BRINP3                         | 0.016          | 0.043           | 0.714                | 0.039          | 0.033           | 0.225                | 0.000          | 0.001           | 0.991                |
| rs491055    | +                        | -                      | -                       | 1                 | 190308834                  | BRINP3                         | 0.024          | 0.043           | 0.574                | 0.054          | 0.032           | 0.092                | 0.000          | 0.001           | 0.970                |
| rs10754220  | +                        | -                      | -                       | 1                 | 197244290                  | CRB1                           | -0.114         | 0.054           | 0.035                | 0.011          | 0.041           | 0.794                | -0.003         | 0.002           | 0.067                |
| rs2803015   | +                        | -                      | -                       | 2                 | 20182164                   | LINC01                         | -0.110         | 0.069           | 0.112                | -0.083         | 0.052           | 0.112                | -0.001         | 0.002           | 0.509                |
| rs231314    | +                        | -                      | -                       | 2                 | 205719532                  | NUCKS1                         | 0.071          | 0.041           | 0.080                | 0.042          | 0.031           | 0.168                | 0.002          | 0.001           | 1.135                |
| rs9786986   | +                        | -                      | -                       | 2                 | 235656632                  | B3GALNT2                       | 0.036          | 0.041           | 0.381                | 0.033          | 0.031           | 0.281                | 0.001          | 0.001           | 0.672                |
| rs9939584   | +                        | -                      | -                       | 2                 | 621558                     | LINC05373352, TMEH18           | -0.220         | 0.067           | 0.001                | -0.217         | 0.051           | 0.000                | -0.003         | 0.002           | 0.152                |
| rs13021737  | +                        | -                      | -                       | 2                 | 632348                     | LINC05373352, TMEH18           | -0.214         | 0.067           | 0.001                | -0.208         | 0.051           | 0.000                | -0.003         | 0.002           | 0.177                |
| rs4854349   | +                        | -                      | -                       | 2                 | 647861                     | LINC05373352, TMEH18           | -0.191         | 0.067           | 0.004                | -0.190         | 0.051           | 0.000                | -0.002         | 0.002           | 0.230                |
| rs111612372 | +                        | -                      | -                       | 2                 | 2043218                    | SDCL, PUM2                     | 0.059          | 0.051           | 0.247                | -0.014         | 0.039           | 0.718                | 0.002          | 0.002           | 0.188                |
| rs11676272  | +                        | -                      | -                       | 2                 | 25141538                   | ADCY3                          | 0.136          | 0.040           | 0.001                | 0.078          | 0.030           | 0.011                | 0.003          | 0.001           | 0.015                |
| rs10182181  | +                        | -                      | -                       | 2                 | 25150296                   | ADCY3, DNAH27                  | 0.137          | 0.040           | 0.001                | 0.076          | 0.030           | 0.013                | 0.003          | 0.001           | 0.014                |
| rs1713586   | +                        | -                      | -                       | 2                 | 25158008                   | ADCY3, DNAH27                  | -0.128         | 0.040           | 0.004                | -0.058         | 0.030           | 0.056                | -0.003         | 0.001           | 0.017                |
| rs11126666  | +                        | -                      | -                       | 2                 | 26928811                   | KCNK3                          | -0.125         | 0.043           | 0.567                | -0.057         | 0.033           | 0.082                | -0.001         | 0.001           | 0.584                |
| rs6734118   | +                        | -                      | -                       | 2                 | 37559355                   | PRKD3, QPCT                    | -0.031         | 0.041           | 0.446                | -0.011         | 0.031           | 0.730                | -0.001         | 0.001           | 0.777                |
| rs7748951   | +                        | -                      | -                       | 2                 | 38750287                   | LINC01929596, HHRNP18          | 0.048          | 0.086           | 0.572                | 0.093          | 0.065           | 0.151                | 0.001          | 0.003           | 0.626                |
| rs45296023  | +                        | -                      | -                       | 2                 | 48955683                   | LHGCR, STON1-GTF2A1L           | 0.041          | 0.041           | 0.069                | 0.001          | 0.031           | 0.971                | -0.002         | 0.001           | 0.553                |
| rs10174398  | +                        | -                      | -                       | 2                 | 51195601                   | NRXN1                          | 0.033          | 0.041           | 0.426                | 0.061          | 0.031           | 0.051                | 0.000          | 0.001           | 0.896                |
| rs10197655  | +                        | -                      | -                       | 2                 | 58791420                   | LINC01122                      | 0.086          | 0.041           | 0.037                | 0.078          | 0.031           | 0.013                | 0.001          | 0.001           | 0.277                |
| rs4671328   | +                        | -                      | -                       | 2                 | 58935282                   | LINC01122                      | 0.038          | 0.042           | 0.363                | 0.088          | 0.032           | 0.005                | 0.000          | 0.001           | 0.721                |
| rs11868816  | +                        | -                      | -                       | 2                 | 63053048                   | EHBP1                          | 0.050          | 0.048           | 0.300                | 0.028          | 0.036           | 0.443                | 0.001          | 0.001           | 0.679                |
| rs12617004  | +                        | -                      | -                       | 2                 | 142615136                  | LRF1B                          | 0.020          | 0.042           | 0.464                | -0.025         | 0.031           | 0.427                | -0.001         | 0.001           | 0.756                |
| rs2390669   | +                        | -                      | -                       | 2                 | 169091942                  | STK39                          | 0.015          | 0.048           | 0.762                | 0.026          | 0.037           | 0.472                | 0.000          | 0.001           | 0.978                |
| rs6433857   | +                        | -                      | -                       | 2                 | 181517996                  | CWC22, SCHLAP1                 | -0.034         | 0.043           | 0.426                | 0.020          | 0.033           | 0.551                | -0.002         | 0.001           | 0.200                |
| rs1528435   | +                        | -                      | -                       | 2                 | 181550962                  | CWC22, SCHLAP1                 | -0.035         | 0.044           | 0.429                | 0.008          | 0.033           | 0.821                | -0.002         | 0.001           | 0.248                |
| rs15795376  | +                        | -                      | -                       | 2                 | 205340222                  | CCO3, PARO8                    | 0.053          | 0.043           | 0.191                | 0.003          | 0.031           | 0.911                | -0.002         | 0.001           | 0.248                |
| rs972540    | +                        | -                      | -                       | 2                 | 207244783                  | ZDRF2, ADAM423                 | 0.056          | 0.054           | 0.309                | -0.002         | 0.041           | 0.964                | -0.002         | 0.002           | 0.170                |
| rs11692326  | +                        | -                      | -                       | 2                 | 208263279                  | LINC01802, CREB1               | -0.027         | 0.056           | 0.631                | -0.027         | 0.042           | 0.518                | -0.001         | 0.002           | 0.389                |
| rs7565158   | +                        | -                      | -                       | 2                 | 213593970                  | ERBB4, LINC01878               | 0.023          | 0.041           | 0.584                | 0.016          | 0.031           | 0.596                | 0.000          | 0.001           | 0.963                |
| rs4072096   | +                        | -                      | -                       | 2                 | 22703603                   | LINC64736                      | -0.064         | 0.041           | 0.123                | 0.006          | 0.031           | 0.837                | -0.001         | 0.001           | 0.248                |
| rs2574704   | +                        | -                      | -                       | 2                 | 1165381                    | IGL1A                          | -0.058         | 0.041           | 0.043                | -0.063         | 0.031           | 0.053                | -0.001         | 0.001           | 0.351                |
| rs10510554  | +                        | -                      | -                       | 3                 | 25099776                   | RARB                           | -0.005         | 0.041           | 0.904                | -0.043         | 0.031           | 0.170                | 0.001          | 0.001           | 0.526                |
| rs1892473   | +                        | -                      | -                       | 3                 | 42299399                   | CCX                            | -0.024         | 0.069           | 0.725                | -0.086         | 0.052           | 0.100                | -0.001         | 0.002           | 0.570                |
| rs10460960  | +                        | -                      | -                       | 3                 | 42308735                   | CCX, LZVL4                     | -0.038         | 0.045           | 0.398                | -0.023         | 0.034           | 0.497                | -0.001         | 0.001           | 0.697                |
| rs7613875   | +                        | -                      | -                       | 3                 | 49913514                   | MON1A, RBM6                    | 0.051          | 0.043           | 0.055                | 0.025          | 0.042           | 0.550                | 0.001          | 0.001           | 0.286                |
| rs11130319  | +                        | -                      | -                       | 3                 | 52755592                   | NEK4                           | 0.066          | 0.041           | 0.105                | 0.053          | 0.031           | 0.085                | -0.001         | 0.001           | 0.559                |
| rs2240920   | +                        | -                      | -                       | 3                 | 52831009                   | ITH3                           | 0.051          | 0.041           | 0.207                | 0.023          | 0.031           | 0.456                | -0.001         | 0.001           | 0.493                |
| rs2365389   | +                        | -                      | -                       | 3                 | 61236462                   | FHT                            | 0.011          | 0.071           | 0.881                | 0.044          | 0.054           | 0.412                | -0.002         | 0.002           | 0.438                |
| rs12495177  | +                        | -                      | -                       | 3                 | 63886077                   | CADM2                          | -0.050         | 0.044           | 0.251                | -0.014         | 0.033           | 0.669                | 0.000          | 0.001           | 0.763                |
| rs2869975   | +                        | -                      | -                       | 3                 | 11683523                   | LINC00901, LINC02024           | 0.065          | 0.047           | 0.173                | 0.042          | 0.032           | 0.057                | 0.000          | 0.001           | 0.767                |
| rs1225051   | +                        | -                      | -                       | 3                 | 131645972                  | CPE4                           | -0.061         | 0.041           | 0.135                | -0.048         | 0.031           | 0.121                | -0.001         | 0.001           | 0.530                |
| rs7621025   | +                        | -                      | -                       | 3                 | 136272246                  | STAG1                          | -0.035         | 0.052           | 0.506                | 0.001          | 0.040           | 0.978                | -0.001         | 0.002           | 0.676                |
| rs16851483  | +                        | -                      | -                       | 3                 | 141275436                  | RASA2                          | 0.057          | 0.045           | 0.207                | 0.030          | 0.034           | 0.375                | 0.001          | 0.001           | 0.277                |
| rs138981    | +                        | -                      | -                       | 3                 | 15183115                   | MDACL2-AS1, LINC01928166       | 0.053          | 0.043           | 0.187                | 0.008          | 0.034           | 0.605                | 0.001          | 0.001           | 0.621                |
| rs4686392   | +                        | -                      | -                       | 3                 | 185524081                  | IGF2BP2                        | -0.046         | 0.043           | 0.283                | 0.025          | 0.033           | 0.444                | -0.001         | 0.001           | 0.345                |
| rs3774854   | +                        | -                      | -                       | 4                 | 5711368                    | EVC2                           | 0.144          | 0.045           | 0.001                | 0.093          | 0.034           | 0.006                | 0.002          | 0.001           | 0.140                |
| rs1996023   | +                        | -                      | -                       | 4                 | 45164637                   | GNPDA2, GABRG1                 | 0.137          | 0.045           | 0.003                | 0.070          | 0.034           | 0.040                | 0.002          | 0.001           | 0.079                |
| rs13130484  | +                        | -                      | -                       | 4                 | 45175691                   | GNPDA2, GABRG1                 | -0.012         | 0.041           | 0.719                | 0.022          | 0.031           | 0.482                | -0.001         | 0.001           | 0.220                |
| rs10933937  | +                        | -                      | -                       | 4                 | 4518237                    | GNPDA2, GABRG1                 | 0.147          | 0.045           | 0.001                | 0.094          | 0.034           | 0.001                | 0.002          | 0.001           | 0.820                |
| rs1229984   | +                        | -                      | -                       | 4                 | 100239319                  | ADH1B                          | 0.030          | 0.046           | 0.516                | 0.030          | 0.035           | 0.385                | 0.000          | 0.001           | 0.820                |
| rs4834272   | +                        | -                      | -                       | 4                 | 113313986                  | ALPK1                          | -0.073         | 0.041           | 0.072                | 0.011          | 0.031           | 0.721                | -0.002         | 0.001           | 0.160                |
| rs16869212  | +                        | -                      | -                       | 4                 | 16882090                   | MYO16                          | 0.003          | 0.042           | 0.934                | 0.046          | 0.032           | 0.131                | 0.000          | 0.001           | 0.928                |
| rs1712084   | +                        | -                      | -                       | 4                 | 60733933                   | ZSWI6                          | 0.031          | 0.041           | 0.481                | 0.024          | 0.033           | 0.476                | 0.001          | 0.001           | 0.277                |
| rs1035491   | +                        | -                      | -                       | 5                 | 63962177                   | RG378P, FAM159B                | -0.002         | 0.046           | 0.963                | 0.004          | 0.035           | 0.909                | 0.001          | 0.001           | 0.548                |
| rs6881648   | +                        | -                      | -                       | 5                 | 74991849                   | POCS                           | 0.043          | 0.041           | 0.293                | 0.009          | 0.031           | 0.782                | 0.001          | 0.001           | 0.237                |
| rs2112347   | +                        | -                      | -                       | 5                 | 75015242                   | POCS, SVZC                     | 0.044          | 0.041           | 0.284                | 0.009          | 0.031           | 0.779                | 0.001          | 0.001           | 0.255                |
| rs1846974   | +                        | -                      | -                       | 5                 | 87959927                   | LINC0041                       | 0.074          | 0.041           | 0.283                | -0.008         | 0.034           | 0.791                | 0.002          | 0.001           | 0.104                |
| rs16493385  | +                        | -                      | -                       | 5                 | 87978252                   | LINC0041, MEF2C-AS2            | 0.026          | 0.041           | 0.523                | 0.020          | 0.031           | 0.523                | 0.002          | 0.001           | 0.186                |
| rs10062657  | +                        | -                      | -                       | 5                 | 95867908                   | LINC01929710                   | 0.138          | 0.042           | 0.001                | 0.084          | 0.032           | 0.008                | 0.002          | 0.001           | 0.191                |
| rs1582931   | +                        | -                      | -                       | 5                 | 122657199                  | PRDM6, CEP120                  | 0.099          | 0.041           | 0.015                | 0.090          | 0.031           | 0.003                | 0.001          | 0.001           | 0.423                |
| rs437030    | +                        | -                      | -                       | 5                 | 124316031                  | ZNF608, LINC01929421           | -0.053         | 0.041           | 0.195                | 0.019          | 0.031           | 0.542                | -0.002         | 0.001           | 0.091                |
| rs684049    | +                        | -                      | -                       | 5                 | 124320122                  | ZNF608, LINC01929421           | 0.143          | 0.042           | 0.001                | 0.012          | 0.031           | 0.507                | 0.000          | 0.001           | 0.760                |
| rs239120    | +                        | -                      | -                       | 5                 | 133861756                  | WDR22                          | -0.067         | 0.042           | 0.377                | -0.061         | 0.032           | 0.055                | 0.003          | 0.001           | 0.023                |
| rs329122    | +                        | -                      | -                       | 5                 | 133864599                  | JADE2                          | 0.037          | 0.04            |                      |                |                 |                      |                |                 |                      |

| rsID        | chr | bp | ref | alt | SNP | SE        | SNP                    | SE     | SNP   | SE    | SNP    | SE    | SNP   | SE     | SNP   | SE    | SNP    | SE    |       |
|-------------|-----|----|-----|-----|-----|-----------|------------------------|--------|-------|-------|--------|-------|-------|--------|-------|-------|--------|-------|-------|
| rs10795945  | +   | -  | -   | -   | 10  | 12302607  | CDC123, CAMK1D         | -0.012 | 0.041 | 0.767 | 0.029  | 0.031 | 0.352 | -0.001 | 0.001 | 0.531 | -0.001 | 0.001 | 0.468 |
| rs11257655  | +   | -  | -   | -   | 10  | 12307894  | CDC123, CAMK1D         | -0.016 | 0.041 | 0.693 | 0.029  | 0.031 | 0.347 | -0.001 | 0.001 | 0.500 | -0.001 | 0.001 | 0.364 |
| rs11277723  | +   | -  | -   | -   | 10  | 18534623  | CACNB2                 | -0.135 | 0.054 | 0.033 | 0.004  | 0.041 | 0.903 | 0.005  | 0.001 | 0.903 | 0.005  | 0.001 | 0.903 |
| rs7912454   | +   | -  | -   | -   | 10  | 18584792  | CACNB2                 | -0.115 | 0.054 | 0.033 | 0.004  | 0.041 | 0.967 | -0.004 | 0.002 | 0.022 | -0.004 | 0.002 | 0.022 |
| rs11239187  | +   | -  | -   | -   | 10  | 45133277  | CXCL12, TMEM72-AS1     | 0.080  | 0.053 | 0.133 | -0.023 | 0.040 | 0.566 | 0.004  | 0.002 | 0.023 | 0.004  | 0.002 | 0.023 |
| rs2163188   | +   | -  | -   | -   | 10  | 65314711  | REEF3                  | 0.019  | 0.044 | 0.668 | -0.027 | 0.033 | 0.411 | 0.001  | 0.001 | 0.607 | 0.001  | 0.001 | 0.607 |
| rs80117551  | +   | -  | -   | -   | 10  | 69834828  | HERC4                  | -0.161 | 0.047 | 0.001 | -0.069 | 0.035 | 0.051 | -0.004 | 0.001 | 0.022 | -0.004 | 0.001 | 0.022 |
| rs1832886   | +   | -  | -   | -   | 10  | 94477539  | HHEX, EXOC6            | -0.058 | 0.051 | 0.255 | -0.015 | 0.039 | 0.699 | -0.001 | 0.002 | 0.708 | -0.001 | 0.002 | 0.708 |
| rs7923837   | +   | -  | -   | -   | 10  | 94481917  | HHEX, EXOC6            | -0.058 | 0.051 | 0.256 | -0.016 | 0.039 | 0.674 | -0.001 | 0.002 | 0.717 | -0.001 | 0.002 | 0.717 |
| rs12569457  | +   | -  | -   | -   | 10  | 99096676  | FRAT2, RRP12           | -0.016 | 0.052 | 0.762 | -0.010 | 0.039 | 0.796 | 0.000  | 0.002 | 0.836 | 0.000  | 0.002 | 0.836 |
| rs1709422   | +   | -  | -   | -   | 10  | 102395440 | HIF1AN, PAK2           | 0.029  | 0.043 | 0.500 | 0.064  | 0.033 | 0.051 | 0.000  | 0.001 | 0.861 | 0.000  | 0.001 | 0.861 |
| rs2495707   | +   | -  | -   | -   | 10  | 102426449 | HIF1AN, PAK2           | -0.025 | 0.051 | 0.817 | -0.056 | 0.031 | 0.067 | 0.007  | 0.002 | 0.471 | 0.007  | 0.002 | 0.471 |
| rs4409766   | +   | -  | -   | -   | 10  | 104616663 | BORCS7-ASMT            | 0.181  | 0.045 | 0.000 | 0.036  | 0.034 | 0.293 | 0.005  | 0.001 | 0.000 | 0.005  | 0.001 | 0.000 |
| rs1907240   | +   | -  | -   | -   | 10  | 122897959 | WDR11, FGR2            | 0.057  | 0.044 | 0.197 | 0.059  | 0.033 | 0.076 | 0.000  | 0.001 | 0.737 | 0.000  | 0.001 | 0.737 |
| rs2257129   | +   | -  | -   | -   | 10  | 122898697 | WDR11, FGR2            | 0.055  | 0.044 | 0.214 | 0.058  | 0.033 | 0.081 | 0.000  | 0.001 | 0.762 | 0.000  | 0.001 | 0.762 |
| rs7093657   | +   | -  | -   | -   | 10  | 12526468  | BUR3, GPR26            | -0.156 | 0.047 | 0.001 | -0.068 | 0.042 | 0.204 | -0.001 | 0.001 | 0.541 | -0.001 | 0.001 | 0.541 |
| rs1568079   | +   | -  | -   | -   | 10  | 125251751 | BUR3, GPR26            | -0.057 | 0.043 | 0.182 | -0.042 | 0.032 | 0.187 | -0.001 | 0.001 | 0.513 | -0.001 | 0.001 | 0.513 |
| rs60808706  | +   | -  | -   | -   | 11  | 2857233   | KCNQ1                  | 0.088  | 0.041 | 0.034 | 0.067  | 0.031 | 0.032 | 0.001  | 0.001 | 0.253 | 0.001  | 0.001 | 0.253 |
| rs2237897   | +   | -  | -   | -   | 11  | 2858546   | KCNQ1                  | 0.109  | 0.042 | 0.009 | 0.080  | 0.032 | 0.012 | 0.002  | 0.001 | 0.135 | 0.002  | 0.001 | 0.135 |
| rs16937956  | +   | -  | -   | -   | 11  | 8404501   | LMN1, STK33            | 0.089  | 0.042 | 0.032 | 0.036  | 0.031 | 0.246 | 0.003  | 0.001 | 0.040 | 0.003  | 0.001 | 0.040 |
| rs1084009   | +   | -  | -   | -   | 11  | 8667680   | TIRAP                  | 0.123  | 0.042 | 0.004 | 0.052  | 0.032 | 0.004 | 0.003  | 0.001 | 0.034 | 0.003  | 0.001 | 0.034 |
| rs5215      | +   | -  | -   | -   | 11  | 17408630  | KCNJ11                 | -0.117 | 0.042 | 0.006 | -0.028 | 0.032 | 0.381 | -0.003 | 0.001 | 0.006 | -0.003 | 0.001 | 0.006 |
| rs11030100  | +   | -  | -   | -   | 11  | 27677586  | BDNF-AS                | -0.199 | 0.042 | 0.000 | -0.082 | 0.031 | 0.009 | -0.005 | 0.001 | 0.000 | -0.005 | 0.001 | 0.000 |
| rs6265      | +   | -  | -   | -   | 11  | 27679916  | BDNF                   | -0.203 | 0.041 | 0.000 | -0.071 | 0.031 | 0.023 | -0.005 | 0.001 | 0.000 | -0.005 | 0.001 | 0.000 |
| rs11030104  | +   | -  | -   | -   | 11  | 27684517  | BDNF-AS                | 0.268  | 0.042 | 0.000 | 0.067  | 0.031 | 0.023 | 0.001  | 0.001 | 0.000 | 0.001  | 0.001 | 0.000 |
| rs3026401   | +   | -  | -   | -   | 11  | 31807524  | PANX6                  | -0.015 | 0.041 | 0.713 | 0.023  | 0.031 | 0.465 | -0.001 | 0.001 | 0.323 | -0.001 | 0.001 | 0.323 |
| rs3817334   | +   | -  | -   | -   | 11  | 47650993  | MTCH2                  | -0.025 | 0.043 | 0.571 | 0.008  | 0.033 | 0.804 | -0.002 | 0.001 | 0.178 | -0.002 | 0.001 | 0.178 |
| rs11602339  | +   | -  | -   | -   | 11  | 47761471  | FNBP4                  | -0.015 | 0.043 | 0.728 | -0.017 | 0.033 | 0.614 | -0.002 | 0.001 | 0.212 | -0.002 | 0.001 | 0.212 |
| rs506338    | +   | -  | -   | -   | 11  | 64440920  | NRXN2                  | 0.023  | 0.054 | 0.674 | -0.003 | 0.041 | 0.941 | 0.000  | 0.002 | 0.963 | 0.000  | 0.002 | 0.963 |
| rs1712876   | +   | -  | -   | -   | 11  | 7244583   | AKAP1                  | 0.050  | 0.048 | 0.534 | 0.013  | 0.036 | 0.515 | 0.001  | 0.001 | 0.511 | 0.001  | 0.001 | 0.511 |
| rs10899469  | +   | -  | -   | -   | 11  | 78018313  | GAB2                   | -0.028 | 0.041 | 0.916 | -0.052 | 0.031 | 0.095 | -0.001 | 0.001 | 0.585 | -0.001 | 0.001 | 0.585 |
| rs5633855   | +   | -  | -   | -   | 11  | 88134563  | CTSC, GRM5-AS1         | -0.006 | 0.061 | 0.498 | -0.050 | 0.046 | 0.272 | 0.001  | 0.002 | 0.443 | 0.001  | 0.002 | 0.443 |
| rs1048932   | +   | -  | -   | -   | 11  | 115044850 | CADM1                  | 0.079  | 0.041 | 0.054 | 0.053  | 0.031 | 0.090 | 0.002  | 0.001 | 0.190 | 0.002  | 0.001 | 0.190 |
| rs10717983  | +   | -  | -   | -   | 12  | 17141562  | SH3BP1                 | 0.174  | 0.052 | 0.138 | 0.053  | 0.033 | 0.111 | 0.001  | 0.001 | 0.692 | 0.001  | 0.001 | 0.692 |
| rs10841048  | +   | -  | -   | -   | 12  | 18779259  | PKC3CG                 | 0.020  | 0.043 | 0.991 | 0.015  | 0.033 | 0.657 | 0.000  | 0.001 | 0.990 | 0.000  | 0.001 | 0.990 |
| rs80234489  | +   | -  | -   | -   | 12  | 31441179  | FAM60A                 | -0.103 | 0.051 | 0.043 | -0.069 | 0.039 | 0.073 | -0.003 | 0.002 | 0.080 | -0.003 | 0.002 | 0.080 |
| rs4346053   | -   | +  | -   | -   | 12  | 33115820  | PKP2, SYT10            | 0.056  | 0.045 | 0.222 | 0.043  | 0.034 | 0.213 | 0.001  | 0.001 | 0.475 | 0.001  | 0.001 | 0.475 |
| rs7138803   | +   | +  | -   | -   | 12  | 50247468  | BCDML30, FAIM2         | 0.000  | 0.043 | 0.991 | 0.015  | 0.033 | 0.657 | 0.000  | 0.001 | 0.990 | 0.000  | 0.001 | 0.990 |
| rs2052118   | +   | -  | -   | -   | 12  | 50281809  | FAIM2                  | 0.050  | 0.048 | 0.198 | 0.044  | 0.034 | 0.195 | 0.001  | 0.001 | 0.445 | 0.001  | 0.001 | 0.445 |
| rs7132908   | +   | -  | -   | -   | 12  | 50263148  | FAIM2                  | -0.019 | 0.043 | 0.666 | 0.003  | 0.033 | 0.925 | 0.000  | 0.001 | 0.758 | 0.000  | 0.001 | 0.758 |
| rs7511173   | +   | -  | -   | -   | 12  | 53885337  | MAP3K12                | -0.083 | 0.066 | 0.208 | -0.061 | 0.050 | 0.218 | -0.001 | 0.002 | 0.464 | -0.001 | 0.002 | 0.464 |
| rs11105839  | +   | -  | -   | -   | 12  | 91237920  | LINC02392, LINC00615   | -0.029 | 0.041 | 0.478 | 0.031  | 0.031 | 0.318 | -0.002 | 0.001 | 0.130 | -0.002 | 0.001 | 0.130 |
| rs7325242   | +   | -  | -   | -   | 12  | 11226162  | ALDH2, MAPK9AS-AS1     | 0.056  | 0.042 | 0.001 | 0.056  | 0.032 | 0.081 | 0.001  | 0.001 | 0.364 | 0.001  | 0.001 | 0.364 |
| rs301712    | +   | -  | -   | -   | 12  | 112641377 | HECTD4                 | 0.056  | 0.043 | 0.191 | 0.049  | 0.032 | 0.132 | 0.001  | 0.001 | 0.446 | 0.001  | 0.001 | 0.446 |
| rs10507285  | -   | +  | -   | -   | 12  | 118295924 | KSR2                   | 0.106  | 0.060 | 0.078 | 0.032  | 0.046 | 0.477 | 0.003  | 0.002 | 0.151 | 0.003  | 0.002 | 0.151 |
| rs4319547   | +   | -  | -   | -   | 12  | 123079035 | KNTC1                  | -0.063 | 0.058 | 0.274 | -0.039 | 0.044 | 0.370 | -0.001 | 0.002 | 0.437 | -0.001 | 0.002 | 0.437 |
| rs1006353   | +   | -  | -   | -   | 13  | 28047269  | MTF3, LINC2            | -0.020 | 0.042 | 0.835 | 0.001  | 0.032 | 0.965 | -0.001 | 0.001 | 0.512 | -0.001 | 0.001 | 0.512 |
| rs1751857   | +   | -  | -   | -   | 13  | 40069438  | LINC00598              | 0.063  | 0.049 | 0.138 | 0.040  | 0.037 | 0.299 | 0.001  | 0.001 | 0.654 | 0.001  | 0.001 | 0.654 |
| rs12429545  | +   | +  | -   | -   | 13  | 54102206  | LINC01065, LINC00558   | 0.084  | 0.049 | 0.085 | 0.045  | 0.037 | 0.220 | 0.002  | 0.001 | 0.230 | 0.002  | 0.001 | 0.230 |
| rs9568867   | +   | -  | -   | -   | 13  | 54107352  | LINC01065, LINC00558   | 0.084  | 0.049 | 0.086 | 0.045  | 0.037 | 0.219 | 0.002  | 0.001 | 0.234 | 0.002  | 0.001 | 0.234 |
| rs2321882   | +   | -  | -   | -   | 13  | 59451989  | LINC00374, DIAPH3      | 0.001  | 0.064 | 0.987 | 0.069  | 0.049 | 0.155 | -0.002 | 0.002 | 0.412 | -0.002 | 0.002 | 0.412 |
| rs9540963   | +   | -  | -   | -   | 13  | 60261004  | LINC00355, LINC01052   | 0.006  | 0.049 | 0.033 | 0.022  | 0.037 | 0.548 | 0.000  | 0.001 | 0.836 | 0.000  | 0.001 | 0.836 |
| rs1027780   | +   | -  | -   | -   | 13  | 96522191  | HES5T3                 | 0.057  | 0.041 | 0.164 | 0.119  | 0.031 | 0.000 | 0.000  | 0.001 | 0.834 | 0.000  | 0.001 | 0.834 |
| rs10132280  | +   | -  | -   | -   | 14  | 25928179  | STX8P6, NOVA1          | 0.054  | 0.079 | 0.499 | 0.070  | 0.060 | 0.245 | 0.000  | 0.002 | 0.931 | 0.000  | 0.002 | 0.931 |
| rs12895330  | +   | -  | -   | -   | 14  | 33305343  | AKAP6, NPAS3           | 0.131  | 0.050 | 0.008 | 0.084  | 0.038 | 0.025 | 0.003  | 0.001 | 0.060 | 0.003  | 0.001 | 0.060 |
| rs712419    | +   | -  | -   | -   | 14  | 45203476  | LINC05374P7, LINC02302 | -0.055 | 0.056 | 0.328 | -0.005 | 0.042 | 0.912 | -0.002 | 0.002 | 0.199 | -0.002 | 0.002 | 0.199 |
| rs7576625   | +   | -  | -   | -   | 14  | 5251211   | NED                    | 0.189  | 0.042 | 0.001 | 0.189  | 0.049 | 0.299 | 0.001  | 0.001 | 0.445 | 0.001  | 0.001 | 0.445 |
| rs7141420   | +   | -  | -   | -   | 14  | 79899454  | NRXN3                  | 0.061  | 0.043 | 0.154 | 0.031  | 0.032 | 0.342 | 0.000  | 0.001 | 0.733 | 0.000  | 0.001 | 0.733 |
| rs3783890   | +   | -  | -   | -   | 14  | 93790276  | BTBD7                  | -0.032 | 0.043 | 0.455 | -0.037 | 0.032 | 0.251 | -0.001 | 0.001 | 0.595 | -0.001 | 0.001 | 0.595 |
| rs792050    | +   | -  | -   | -   | 14  | 94109502  | LINC79                 | 0.036  | 0.042 | 0.387 | 0.006  | 0.032 | 0.852 | 0.001  | 0.001 | 0.247 | 0.001  | 0.001 | 0.247 |
| rs790460    | +   | -  | -   | -   | 14  | 10414975  | RIL1                   | -0.042 | 0.051 | 0.021 | -0.034 | 0.046 | 0.456 | -0.002 | 0.002 | 0.446 | -0.002 | 0.002 | 0.446 |
| rs112440086 | +   | -  | -   | -   | 15  | 27038492  | GABRB3, GABRAS         | -0.082 | 0.042 | 0.927 | -0.015 | 0.032 | 0.629 | -0.002 | 0.001 | 0.194 | -0.002 | 0.001 | 0.194 |
| rs1559677   | +   | -  | -   | -   | 15  | 47738063  | SEMA6D                 | 0.047  | 0.041 | 0.249 | 0.064  | 0.031 | 0.038 | 0.001  | 0.001 | 0.354 | 0.001  | 0.001 | 0.354 |
| rs9888736   | +   | -  | -   | -   | 15  | 47940812  | SEMA6D                 | -0.133 | 0.041 | 0.001 | -0.100 | 0.031 | 0.001 | -0.001 | 0.001 | 0.272 | -0.001 | 0.001 | 0.272 |
| rs2593235   | +   | -  | -   | -   | 15  | 57541201  | TCF21                  | -0.005 | 0.042 | 0.905 | -0.050 | 0.031 | 0.108 | -0.001 | 0.001 | 0.575 | -0.001 | 0.001 | 0.575 |

**eTable 2.** List of SNPs excluded from the initial candidate variants for analysis

| SNP                                         | Current BMI <sup>a</sup> | BMI at 20 <sup>b</sup> | BMI change <sup>c</sup> | Chr. <sup>d</sup> | Position (bp) <sup>d</sup> | Candidate gene(s)            |
|---------------------------------------------|--------------------------|------------------------|-------------------------|-------------------|----------------------------|------------------------------|
| (i) No available in imputed genotyping data |                          |                        |                         |                   |                            |                              |
| rs17264034                                  |                          |                        | +                       | 5                 | 9557602                    | <i>AC026787.1,SNHG18</i>     |
| rs6885147                                   |                          |                        | +                       | 5                 | 64448670                   | <i>ADAMTS6</i>               |
| rs4869139                                   | +                        |                        |                         | 5                 | 95858668                   | <i>LOC101929710</i>          |
| rs4308481                                   | +                        |                        |                         | 5                 | 122652106                  | <i>PRDM6,CEP120</i>          |
| rs3849724                                   | +                        |                        |                         | 5                 | 173290977                  | <i>LINC01485,CPEB4</i>       |
| rs183975233                                 | +                        |                        |                         | 6                 | 32437160                   | <i>HLA-DRA,HLA-DRB5</i>      |
| rs115472351                                 | +                        |                        |                         | 6                 | 32591448                   | <i>HLA-DRB1,HLA-DQA1</i>     |
| rs10120246                                  |                          |                        | +                       | 9                 | 9799050                    | <i>PTPRD</i>                 |
| rs11607976                                  | +                        |                        |                         | 11                | 69279111                   | <i>MYEOV,LINC01488</i>       |
| rs180950758                                 | +                        |                        |                         | 17                | 29036425                   | <i>SUZ12P1</i>               |
| rs1379871                                   | +                        |                        |                         | X                 | 31854782                   | <i>DMD</i>                   |
| rs6529684                                   | +                        |                        |                         | X                 | 53542107                   | <i>HSD17B10,HUWE1</i>        |
| rs3121672                                   | +                        |                        |                         | X                 | 117916370                  | <i>IL13RA1</i>               |
| rs1190736                                   | +                        |                        |                         | X                 | 136113464                  | <i>GPR101</i>                |
| rs5945324                                   | +                        |                        |                         | X                 | 152894551                  | <i>FAM58A,DUSP9</i>          |
| (ii) MAF <0.05                              |                          |                        |                         |                   |                            |                              |
| rs2590942                                   |                          | +                      |                         | 1                 | 72885281                   | <i>RNU6-1246P,RPL31P12</i>   |
| rs7550711                                   |                          | +                      |                         | 1                 | 110082886                  | <i>AL355310.3,GPR61</i>      |
| rs17024393                                  |                          | +                      |                         | 1                 | 110154688                  | <i>GNAT2,GNAI3</i>           |
| rs199950                                    |                          |                        | +                       | 1                 | 181590858                  | <i>CACNA1E</i>               |
| rs34585985                                  |                          |                        | +                       | 1                 | 210489411                  | <i>AL035414.1,HHAT</i>       |
| rs10208649                                  | +                        |                        |                         | 2                 | 54161363                   | <i>PSME4</i>                 |
| rs13387838                                  |                          | +                      |                         | 2                 | 207281447                  | <i>C017081.1,HNRNPA1P51</i>  |
| rs7599312                                   | +                        |                        |                         | 2                 | 213413231                  | <i>ERBB4,MIR4776-2</i>       |
| rs41526344                                  |                          |                        | +                       | 3                 | 2985142                    | <i>CNTN4</i>                 |
| rs1899951                                   | +                        |                        |                         | 3                 | 12394840                   | <i>PPARG</i>                 |
| rs9847124                                   |                          |                        | +                       | 3                 | 152590762                  | <i>HMG2P13,P2RY1</i>         |
| rs1516725                                   | +                        |                        |                         | 3                 | 185824004                  | <i>ETV5</i>                  |
| rs6447650                                   |                          |                        | +                       | 4                 | 40381210                   | <i>RNU7-74P,RBM47</i>        |
| rs13107325                                  |                          | +                      |                         | 4                 | 103188709                  | <i>SLC39A8</i>               |
| rs28580297                                  |                          |                        | +                       | 4                 | 119427957                  | <i>CEP170P1</i>              |
| rs25832                                     |                          | +                      |                         | 5                 | 66175682                   | <i>MAST4</i>                 |
| rs10041997                                  |                          |                        | +                       | 5                 | 120198311                  | <i>AC114284.1,AC008565.1</i> |
| rs17107133                                  |                          |                        | +                       | 5                 | 147059015                  | <i>JAKMIP2</i>               |
| rs7715256                                   |                          | +                      |                         | 5                 | 153537893                  | <i>MFAP3</i>                 |
| rs4569924                                   |                          | +                      |                         | 5                 | 153540025                  | <i>MFAP3</i>                 |
| rs1347155                                   |                          |                        | +                       | 5                 | 171969348                  | <i>SH3PXD2B,LINC01944</i>    |
| rs148546399                                 | +                        |                        |                         | 6                 | 64705610                   | <i>EYS</i>                   |
| rs17601580                                  |                          |                        | +                       | 6                 | 132061420                  | <i>ENPP3</i>                 |
| rs1167827                                   | +                        |                        |                         | 7                 | 75163169                   | <i>HIP1</i>                  |
| rs7869969                                   |                          | +                      |                         | 9                 | 96217447                   | <i>FAM120A</i>               |
| rs7903146                                   | +                        |                        |                         | 10                | 114758349                  | <i>TCF7L2</i>                |
| rs4751240                                   |                          |                        | +                       | 10                | 129136409                  | <i>DOCK1</i>                 |
| rs17309930                                  |                          | +                      |                         | 11                | 27748493                   | <i>AC103796.1</i>            |
| rs12865097                                  |                          |                        | +                       | 13                | 45477410                   | <i>LINC00330,NUFIP1</i>      |
| rs10151686                                  |                          | +                      |                         | 14                | 30466466                   | <i>AL133372.2,PRKD1</i>      |
| rs927251                                    |                          |                        | +                       | 14                | 58311135                   | <i>SLC35F4</i>               |
| rs12897644                                  |                          |                        | +                       | 14                | 95838401                   | <i>SYNE3,LINC02292</i>       |
| rs12446632                                  |                          | +                      |                         | 16                | 19935389                   | <i>GPR139,GPRC5B</i>         |
| rs55769859                                  |                          |                        | +                       | 22                | 46353046                   | <i>WNT7B</i>                 |

BMI, body mass index; bp, base pair; Chr., chromosome; MAF: minor allele frequency; SE, standard error; SNP, single nucleotide polymorphism.

We extracted candidate SNPs which marked "+"<sup>a</sup> from the BioBank Japan project report, by searching "childhood body mass index" and "longitudinal BMI measurement" in the GWAS catalog.

<sup>d</sup>Positions are based on Human Genome version 19 (hg19), build 37.

**eTable 3.** Sex-stratified analysis of the 11 significant SNPs

| SNP        | Chr. <sup>a</sup> | Position (bp) <sup>a</sup> | REF/ALT   | Candidate gene(s)           | Current BMI           |           |                       |                      | BMI at 20       |                       |                      |                       | BMI change |                      |                       |       |                       |       |                 |       |          |        |       |          |       |
|------------|-------------------|----------------------------|-----------|-----------------------------|-----------------------|-----------|-----------------------|----------------------|-----------------|-----------------------|----------------------|-----------------------|------------|----------------------|-----------------------|-------|-----------------------|-------|-----------------|-------|----------|--------|-------|----------|-------|
|            |                   |                            |           |                             | Male                  |           | Female                |                      | p-heterogeneity | Male                  |                      | Female                |            | p-heterogeneity      | Male                  |       | Female                |       | p-heterogeneity |       |          |        |       |          |       |
|            |                   |                            |           |                             | Adjusted <sup>d</sup> |           | Adjusted <sup>d</sup> |                      |                 | Adjusted <sup>d</sup> |                      | Adjusted <sup>d</sup> |            |                      | Adjusted <sup>d</sup> |       | Adjusted <sup>d</sup> |       |                 |       |          |        |       |          |       |
| $\beta^b$  | SE                | P-value <sup>c</sup>       | $\beta^b$ | SE                          | P-value <sup>c</sup>  | $\beta^b$ | SE                    | P-value <sup>c</sup> | $\beta^b$       | SE                    | P-value <sup>c</sup> | $\beta^b$             | SE         | P-value <sup>c</sup> | $\beta^b$             | SE    | P-value <sup>c</sup>  |       |                 |       |          |        |       |          |       |
| rs939584   | 2                 | 621558                     | C/T       | <i>LOC105373352, TMEM18</i> | -0.206                | 0.097     | 3.43E-02              | -0.228               | 0.092           | 1.30E-02              | 0.918                | -0.297                | 0.077      | 1.16E-04             | -0.144                | 0.067 | 3.10E-02              | 0.127 | 0.000           | 0.003 | 9.66E-01 | -0.005 | 0.003 | 7.12E-02 | 0.441 |
| rs13021737 | 2                 | 632348                     | A/G       | <i>LOC105373352, TMEM18</i> | -0.186                | 0.097     | 5.51E-02              | -0.232               | 0.091           | 1.11E-02              | 0.914                | -0.269                | 0.077      | 4.88E-04             | -0.154                | 0.067 | 2.07E-02              | 0.260 | 0.000           | 0.003 | 9.64E-01 | -0.005 | 0.003 | 7.14E-02 | 0.387 |
| rs4854349  | 2                 | 647861                     | T/C       | <i>LOC105373352, TMEM18</i> | -0.170                | 0.097     | 7.83E-02              | -0.204               | 0.091           | 2.46E-02              | 0.984                | -0.257                | 0.077      | 8.20E-04             | -0.131                | 0.066 | 4.80E-02              | 0.215 | 0.000           | 0.003 | 9.33E-01 | -0.004 | 0.003 | 1.07E-01 | 0.442 |
| rs4409766  | 10                | 104616663                  | T/C       | <i>BORCS7-ASMT</i>          | 0.176                 | 0.066     | 7.39E-03              | 0.201                | 0.060           | 7.94E-04              | 0.734                | 0.061                 | 0.052      | 2.41E-01             | 0.022                 | 0.044 | 6.17E-01              | 0.501 | 0.004           | 0.002 | 1.88E-02 | 0.006  | 0.002 | 8.88E-04 | 0.543 |
| rs11030100 | 11                | 27677586                   | G/T       | <i>BDNF-AS</i>              | -0.192                | 0.061     | 1.68E-03              | -0.206               | 0.056           | 2.14E-04              | 0.382                | -0.100                | 0.049      | 3.86E-02             | -0.063                | 0.041 | 1.19E-01              | 0.588 | -0.004          | 0.002 | 2.89E-02 | -0.005 | 0.002 | 1.38E-03 | 0.201 |
| rs6265     | 11                | 27679916                   | C/T       | <i>BDNF</i>                 | -0.189                | 0.061     | 1.97E-03              | -0.218               | 0.056           | 8.86E-05              | 0.252                | -0.093                | 0.048      | 5.38E-02             | -0.051                | 0.041 | 2.12E-01              | 0.555 | -0.004          | 0.002 | 2.39E-02 | -0.006 | 0.002 | 3.31E-04 | 0.112 |
| rs11030104 | 11                | 27684517                   | A/G       | <i>BDNF-AS</i>              | -0.189                | 0.061     | 2.00E-03              | -0.219               | 0.056           | 8.34E-05              | 0.236                | -0.089                | 0.049      | 6.59E-02             | -0.047                | 0.041 | 2.45E-01              | 0.580 | -0.004          | 0.002 | 2.13E-02 | -0.006 | 0.002 | 2.27E-04 | 0.099 |
| rs1927790  | 13                | 96922191                   | T/C       | <i>H56ST3</i>               | 0.102                 | 0.061     | 9.26E-02              | 0.026                | 0.055           | 6.39E-01              | 0.302                | 0.131                 | 0.048      | 6.67E-03             | 0.112                 | 0.040 | 5.30E-03              | 0.657 | 0.001           | 0.002 | 6.19E-01 | -0.001 | 0.002 | 6.02E-01 | 0.361 |
| rs1421085  | 16                | 53800954                   | T/C       | <i>FTO</i>                  | 0.264                 | 0.075     | 4.39E-04              | 0.390                | 0.069           | 1.91E-08              | 0.070                | 0.159                 | 0.060      | 7.87E-03             | 0.184                 | 0.051 | 2.73E-04              | 0.805 | 0.005           | 0.002 | 1.62E-02 | 0.008  | 0.002 | 1.24E-04 | 0.135 |
| rs11642015 | 16                | 53802494                   | C/T       | <i>FTO</i>                  | 0.262                 | 0.075     | 5.04E-04              | 0.399                | 0.069           | 8.21E-09              | 0.053                | 0.159                 | 0.060      | 7.99E-03             | 0.184                 | 0.051 | 2.79E-04              | 0.810 | 0.005           | 0.002 | 1.80E-02 | 0.009  | 0.002 | 4.85E-05 | 0.095 |
| rs1558902  | 16                | 53803574                   | T/A       | <i>FTO</i>                  | 0.265                 | 0.075     | 4.35E-04              | 0.394                | 0.069           | 1.34E-08              | 0.064                | 0.159                 | 0.060      | 7.77E-03             | 0.184                 | 0.051 | 2.74E-04              | 0.809 | 0.005           | 0.002 | 1.66E-02 | 0.008  | 0.002 | 9.26E-05 | 0.121 |

ALT, alternative allele; BMI, body mass index; bp, base pair; Chr., chromosome; REF, reference allele; SE, standard error; SNP, single nucleotide polymorphism.

<sup>a</sup>Positions are based on Human Genome version 19 (hg19), build 37. <sup>b</sup>Alternative alleles were treated as effect alleles.

<sup>c</sup>Significant P-values were defined as  $P \leq 1.77E-04$ .

<sup>d</sup>Adjusted model in current BMI were adjusted for age (continuous), age-squared (continuous), birth year (continuous), and the first five principal components (continuous).

<sup>e</sup>Adjusted model in BMI at 20 were adjusted for birth year (continuous), and the first five principal components (continuous).

<sup>f</sup>Adjusted model in BMI change were adjusted for age (continuous), age-squared (continuous), birth year (continuous), the first five principal components (continuous), and BMI at 20 (continuous).

<sup>g</sup>Significant heterogeneity P-values were defined as  $P \leq 0.05$ .

**eTable 4.** Analysis of 11 significant SNPs excluding DM population in current BMI

| SNP        | Chr. <sup>a</sup> | Position<br>(bp) <sup>a</sup> | REF/ALT   | Candidate gene(s)           | Current BMI                  |       |                 |                             |       |                 |
|------------|-------------------|-------------------------------|-----------|-----------------------------|------------------------------|-------|-----------------|-----------------------------|-------|-----------------|
|            |                   |                               |           |                             | Whole population             |       |                 | Excluding DM population     |       |                 |
|            |                   |                               |           |                             | Adjusted model <sup>d</sup>  |       |                 | Adjusted model <sup>d</sup> |       |                 |
| $\beta^b$  | SE                | <i>P</i> -value <sup>c</sup>  | $\beta^b$ | SE                          | <i>P</i> -value <sup>c</sup> |       |                 |                             |       |                 |
| rs939584   | 2                 | 621558                        | C/T       | <i>LOC105373352, TMEM18</i> | -0.220                       | 0.067 | 1.07E-03        | -0.201                      | 0.068 | 3.07E-03        |
| rs13021737 | 2                 | 632348                        | A/G       | <i>LOC105373352, TMEM18</i> | -0.214                       | 0.067 | 1.48E-03        | -0.194                      | 0.068 | 4.25E-03        |
| rs4854349  | 2                 | 647861                        | T/C       | <i>LOC105373352, TMEM18</i> | -0.191                       | 0.067 | 4.26E-03        | -0.170                      | 0.068 | 1.20E-02        |
| rs4409766  | 10                | 104616663                     | T/C       | <i>BORCS7-ASMT</i>          | 0.181                        | 0.045 | <b>4.96E-05</b> | 0.168                       | 0.045 | 1.91E-04        |
| rs11030100 | 11                | 27677586                      | G/T       | <i>BDNF-AS</i>              | -0.199                       | 0.042 | <b>1.68E-06</b> | -0.191                      | 0.042 | <b>5.03E-06</b> |
| rs6265     | 11                | 27679916                      | C/T       | <i>BDNF</i>                 | -0.203                       | 0.041 | <b>1.00E-06</b> | -0.194                      | 0.042 | <b>3.33E-06</b> |
| rs11030104 | 11                | 27684517                      | A/G       | <i>BDNF-AS</i>              | -0.203                       | 0.042 | <b>1.01E-06</b> | -0.193                      | 0.042 | <b>3.93E-06</b> |
| rs1927790  | 13                | 96922191                      | T/C       | <i>HS6ST3</i>               | 0.057                        | 0.041 | 1.64E-01        | 0.078                       | 0.042 | 5.95E-02        |
| rs1421085  | 16                | 53800954                      | T/C       | <i>FTO</i>                  | 0.335                        | 0.051 | <b>1.24E-10</b> | 0.318                       | 0.052 | <b>1.12E-09</b> |
| rs11642015 | 16                | 53802494                      | C/T       | <i>FTO</i>                  | 0.334                        | 0.051 | <b>7.36E-11</b> | 0.322                       | 0.052 | <b>6.89E-10</b> |
| rs1558902  | 16                | 53803574                      | T/A       | <i>FTO</i>                  | 0.331                        | 0.051 | <b>8.65E-11</b> | 0.320                       | 0.052 | <b>8.17E-10</b> |

ALT, alternative allele; BMI, body mass index; bp, base pair; Chr., chromosome; DM, diabetes mellitus; REF, reference allele; SE, standard error; SNP, single nucleotide polymorphism.

<sup>a</sup>Positions are based on Human Genome version 19 (hg19), build 37. <sup>b</sup>Alternative alleles were treated as effect alleles. <sup>c</sup>Significant *P*-values ( $P \leq 1.77E-04$ ) are shown in bold.

<sup>d</sup>Adjusted model in current BMI were adjusted for age (continuous), age-squared (continuous), sex (male or female), birth year (continuous), and the first five principal components (contin

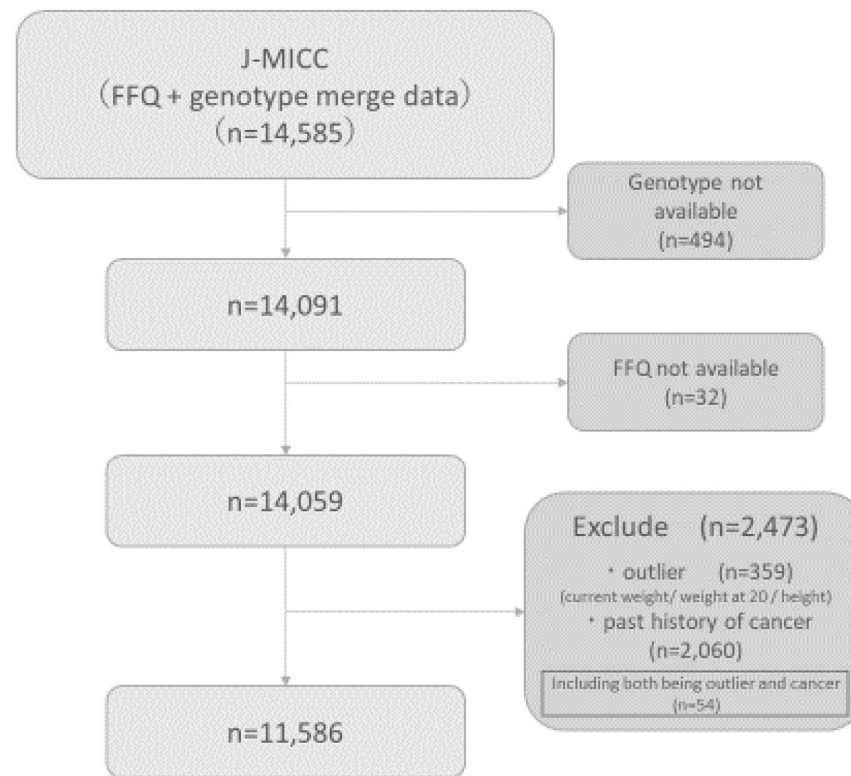

**eFigure 1.** Consort diagram of the eligibility of subjects after merging questionnaire and genotype data. FFQ, food frequency questionnaire.

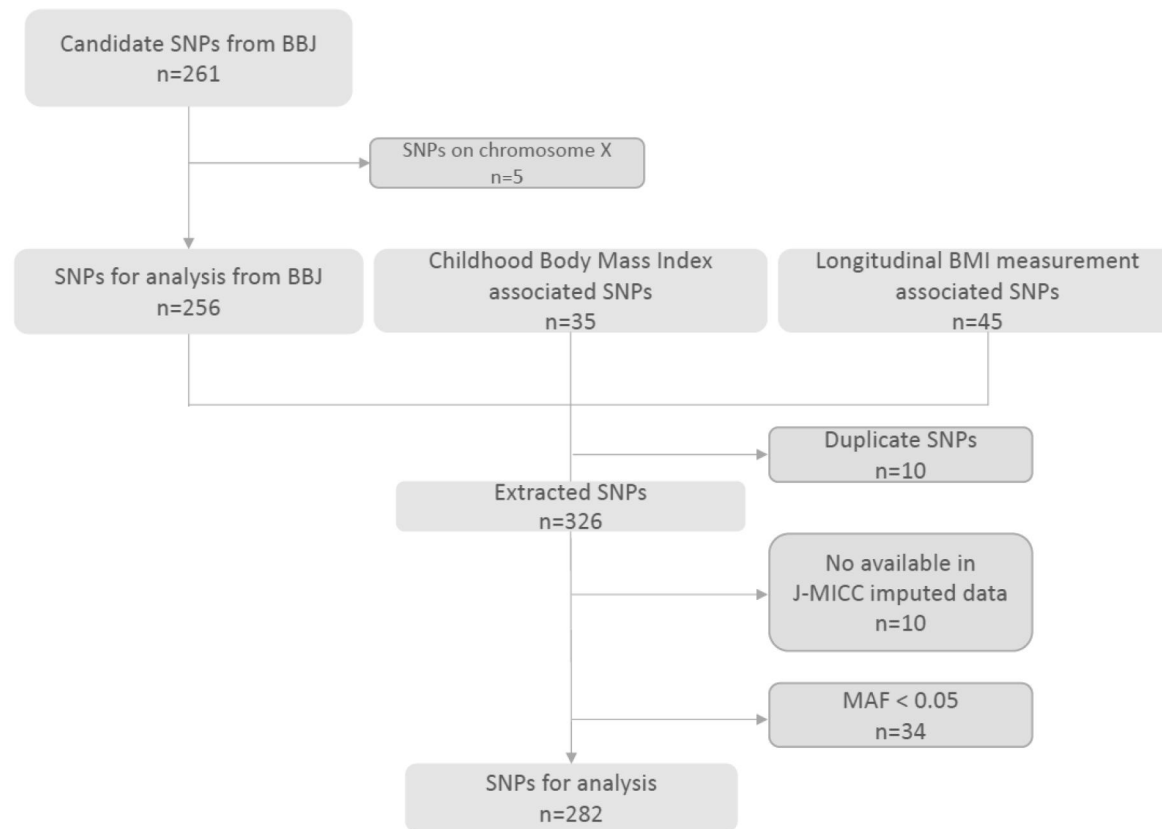

**eFigure 2.** Consort diagram of the selection of candidate loci. BBJ, BioBank Japan study<sup>15</sup>; BMI, body mass index; MAF, minor allele frequency; SNPs, single nucleotide polymorphisms.
